# Supplementary material for: Prevalence of active trachoma and associated risk factors among children of the pastoralist population in Madda Walabu rural district, Southeast Ethiopia: a community-based cross-sectional study
Source: BMC Infect Dis. 2019 Apr 29;19:353. doi: 10.1186/s12879-019-3992-5 (PMC6489250; doi:10.1186/s12879-019-3992-5)
Supplement: Supplementary file 1 — Data collection tool. (PDF 274 kb) [file 12879_2019_3992_MOESM1_ESM.pdf]

## Data Collection Tool

| No. | Questions                                                                                      | Answers (Coding Category)                                                                                                                        |
|-----|------------------------------------------------------------------------------------------------|--------------------------------------------------------------------------------------------------------------------------------------------------|
| 111 | Unique Questionnaire No.                                                                       |                                                                                                                                                  |
| 112 | Age of head of household in years                                                              | __ __                                                                                                                                            |
| 113 | Sex of head of household                                                                       | 1. Male<br>2. Female                                                                                                                             |
| 114 | What is the highest level of school you have attended?                                         | 1. Illiterate<br>2. Can read and write<br>3. Elementary school<br>4. High school & above                                                         |
| 115 | What is the main occupation of the head of the household?                                      | 1. Farmer<br>2. Daily laborer<br>3. Merchant<br>4. Government employee<br>5. Others, specify _____                                               |
| 116 | How many people live in this household?                                                        | __                                                                                                                                               |
| 117 | Number of children <10 years in the household                                                  | __                                                                                                                                               |
| 118 | Age of selected child in years                                                                 | __                                                                                                                                               |
| 119 | Sex of selected child                                                                          | 1. Male<br>2. Female                                                                                                                             |
| 120 | Educational status of child                                                                    | 1. Too young to go to school (pre-school child)<br>2. Not enrolled (not joined school) yet<br>3. Dropped out of school<br>4. Attending school    |
| 121 | If the selected child is in school or drop out of school, what is the highest grade completed? | __                                                                                                                                               |
| 122 | Number of living rooms in the house                                                            | __                                                                                                                                               |
| 123 | What is the main source of water for domestic use of members of your household?                | 1. Piped water/public tap<br>2. Protected well/spring<br>3. Unprotected well/spring<br>4. Rain water collection<br>5. Surface water (River/pond) |
| 124 | Time to main source of water for domestic use (round trip in minutes)?                         | 1. <15 minutes<br>2. 16-30 minutes<br>3. 31-60 minutes<br>4. >60 minutes                                                                         |
| 125 | Amount of water used per day (estimate)                                                        | 1. Greater than 80 liters                                                                                                                        |

|     |                                                                                                                            |                                                                                                                          |
|-----|----------------------------------------------------------------------------------------------------------------------------|--------------------------------------------------------------------------------------------------------------------------|
|     |                                                                                                                            | 2. 60–80 liters<br>3. 20–40 liters<br>4. Less than 20 liters                                                             |
| 126 | Does your household have access to a latrine? (Interviewer needs to verify presence of pit latrine)                        | 1. Yes<br>2. No                                                                                                          |
| 127 | Ask to see the latrine/toilet.<br>Observation: What kind of toilet facility does the household use?                        | 1. Pit latrine<br>2. No facility, they use bush or field<br>3. Other<br>(specify)_____                                   |
| 128 | Latrine use (who uses latrine in the household?)                                                                           | 1. Only adults<br>2. Both adults and children<br>3. Not regularly /consistently used                                     |
| 129 | Observation: Is there a hand washing facility within 15 meters of the latrine/toilet?                                      | 1. Yes<br>2. No<br>3. Not applicable (no latrine)                                                                        |
| 130 | Observation: At the time of the visit, is water available at the hand washing facility?                                    | 1. Yes<br>2. No<br>3. Not applicable (no hand washing facility)                                                          |
| 131 | Observation: At the time of the visit, is soap or ash available at the handwashing facility?                               | 0. Yes<br>1. No<br>2. Not applicable (no hand washing facility)                                                          |
| 133 | Where do you dispose of your garbage? (Interviewer needs to verify presence of pit)                                        | 1. In open field<br>2. Burning/Burying<br>3. In covered pit<br>4. In uncovered pit<br>5. Other, specify_____             |
| 134 | How often does this child wash his/her face? (parent reported)                                                             | 1. Only occasionally<br>2. At least once per day<br>3. More than once per day                                            |
| 135 | Soap use when face last washed (parent reported)                                                                           | 1. Yes<br>2. No                                                                                                          |
| 136 | Do you have any animals (cattle, sheep, goats, camels)?                                                                    | 1. Yes<br>2. No                                                                                                          |
| 137 | Do you keep your animals (cattle, sheep, goats, camels) in the house you are living in? or within 20 meters of the houses? | 1. No, keep separately<br>2. Yes, only at night<br>3. Yes, only during the day<br>4. Yes, both at night & during the day |

|     |                                                     |                                                                                                                                                                                          |
|-----|-----------------------------------------------------|------------------------------------------------------------------------------------------------------------------------------------------------------------------------------------------|
| 138 | Is there animal dung in the compound?<br>(Observe)  | 1. Yes<br>2. No                                                                                                                                                                          |
| 139 | Have you ever heard health information on trachoma? | 1. Yes<br>2. No                                                                                                                                                                          |
| 140 | Where did you hear the trachoma information?        | 1. School/teachers<br>2. Trachoma volunteers<br>3. Health extension worker<br>4. Mass media (TV, radio, etc)<br>5. Health facility<br>6. Community gatherings<br>7. Other, specify _____ |
| 140 | Distance of the nearby health center on foot        | 1. <15 minutes<br>2. 16-30 minutes<br>3. 31-60 minutes<br>4. >60 minutes                                                                                                                 |

## Part II: Facial observation and eye examination

| S.No | Variable Description/Question                                        | Answer/Code                           |
|------|----------------------------------------------------------------------|---------------------------------------|
| 201  | Is there ocular discharge in the child's face?                       | 1. Yes<br>2. No                       |
| 202  | Is there a nasal discharge in the child's face?                      | 1. Yes<br>2. No                       |
| 203  | Is there a fly on the child's face, within 3 seconds of observation? | 1. Yes<br>2. No                       |
| 204  | Is there sign of active trachoma on eye examination?                 | 1. Yes<br>2. No                       |
| 205  | If Q 204 Yes, specify the stage of trachoma                          | 1. TF<br>2. TI<br>3. TF & TI<br>4. TT |

*Thank you for your participation.*
